# Supplementary material
Source: PubMed Central journal article supplement (PMC7657990)
Supplement: NIHMS1641775-supplement-Supplemental_material.pdf [file NIHMS1641775-supplement-Supplemental_material.pdf]

**Supplemental Table** Correlates of Tumor Growth Patterns

| <b>Patient Characteristic</b>              | <b>Rapid growth</b>                                                         | <b>Indolent growth</b>                                                                | <b>Lack of Significant Association</b>                                                                 |
|--------------------------------------------|-----------------------------------------------------------------------------|---------------------------------------------------------------------------------------|--------------------------------------------------------------------------------------------------------|
| <b>Age</b>                                 |                                                                             |                                                                                       | Kim 2017<br>An 2015<br>Villa 2014<br>Furlan 2012<br>Cucchetti 2005<br>Matsuhashi 1996<br>Sheu 1985     |
| <b>Sex</b>                                 |                                                                             |                                                                                       | Kim 2017<br>An 2015<br>Villa 2014<br>Furlan 2012<br>Cucchetti 2005<br>Sheu 1985                        |
| <b>Elevated AFP</b>                        | Rich 2019<br>An 2015<br>Villa 2015<br>Cucchetti 2005                        |                                                                                       | Kim 2017<br>Rowe 2014<br>Furlan 2012<br>Sheu 1985<br>Yoshino 1983<br>Barbara 1992                      |
| <b>AFP Doubling Time</b>                   | Shingaki 2013<br>Mochizuki 2012<br>Yoshino 1983<br>Sheu 1985<br>Ebara 1986* |                                                                                       | An 2015                                                                                                |
| <b>Liver disease etiology</b>              | Rich 2019<br>An 2015<br>Yoshino 1983                                        |                                                                                       | Kim 2017<br>An 2015<br>Villa 2016<br>Furlan 2012<br>Cucchetti 2005<br>Sheu 1985                        |
| <b>Child Pugh Class</b>                    | Kim 2017                                                                    |                                                                                       | An 2015<br>Villa 2015<br>Furlan 2012<br>Cucchetti 2005<br>Sheu 1985<br>Yoshino 1983<br>Matsuhashi 1996 |
| <b>Smaller tumor diameter (continuous)</b> |                                                                             | Rich 2019 <sup>#</sup><br>Kim 2017<br>An 2015<br>Jha 2014<br>Taouli 2005<br>Sheu 1985 | Shingaki 2013<br>Villa 2015<br>Rowe 2014<br>Yoshino 1983<br>Matsuhashi 1996<br>Barbara 1992            |

\*Association with visual inspection of changes in AFP instead of AFP doubling time.

<sup>#</sup> Compartmented TVDT among tumors with diameter 1-2 cm, 2-5 cm, >5 cm. Others noted linear correlation between TVDT and tumor size.

**Supplemental Figure 1** Funnel Plot Analysis for Publication Bias

**Supplemental Figure 2** Subgroup analysis of Tumor Volume Doubling Time based on Location
